# Supplementary material
Source: PubMed Central journal article supplement (PMC2483357)
Supplement: tpc.107.057380_1.pdf [file tpc.107.057380_1.pdf]

Supplemental Data. Qin et al. (2008). *Arabidopsis* DREB2A interacting proteins function as RING E3 ligases and negatively regulate plant drought stress responsive gene expression.

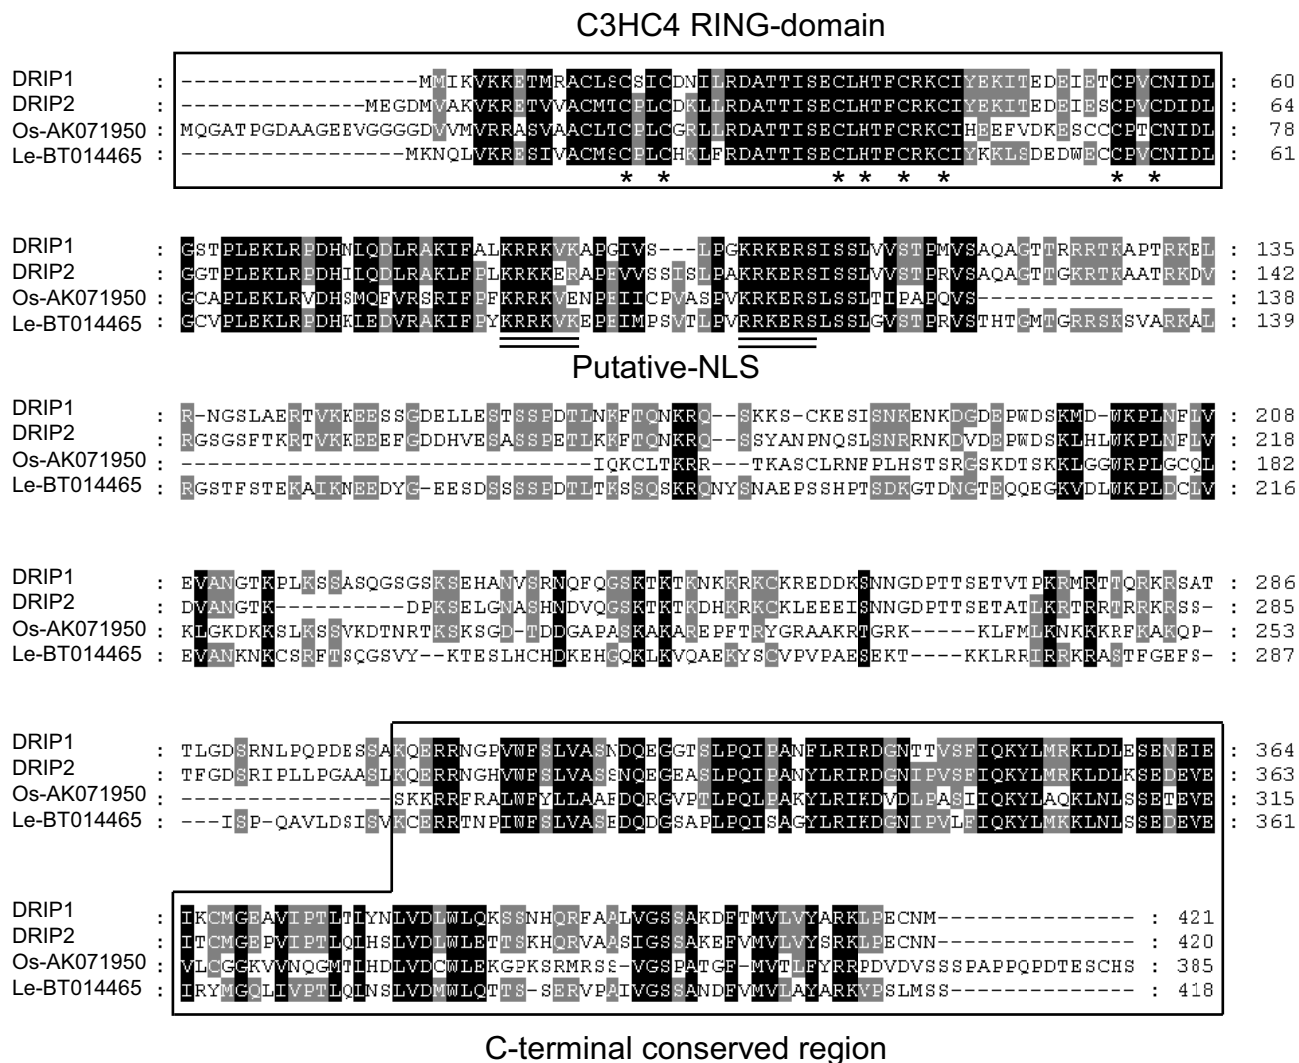

**Supplemental Figure 1. Multiple Sequence Alignment of DRIP1, DRIP2 and Their Orthologs.**

AK071950 is from *Oryza sativa*, and BT014465 is from *Lycopersicon esculentum*. The multi-sequence alignment was processed with ClustalW software (<http://www.ebi.ac.uk/clustalw/>). The putative NLS was predicted by <http://wolfpsort.org/>. The conserved metal-ligand residues of cysteine or histidine are marked with asterisks; the putative NLS is double underlined; and the first 60 amino acids forming the C3HC4 RING domain and C-terminal conserved domain are highlighted in boxes.

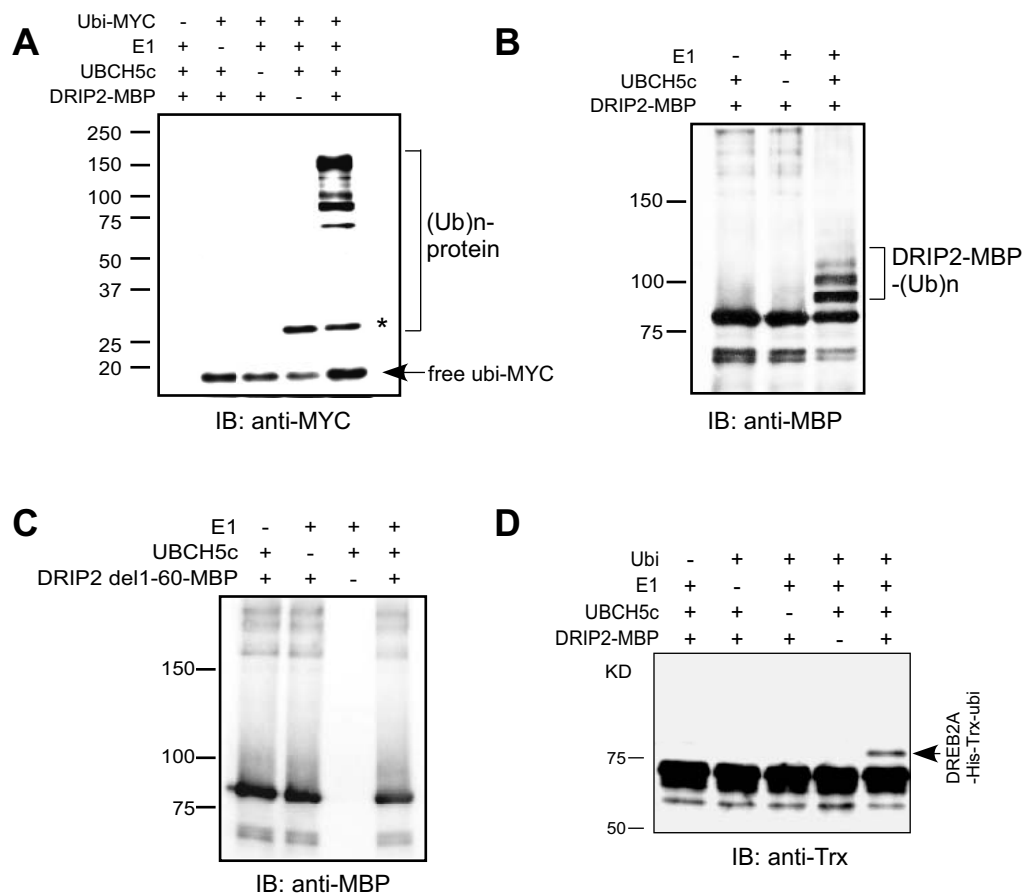

### Supplemental Figure 2. DRIP2 Functions as an E3 Ubiquitin Ligase and Mediated DREB2A Protein Ubiquitination.

(A) In the presence of UBCH5c as E2, DRIP2-MBP fusion protein displayed ubiquitin E3 ligase activity. The ubiquitin attached protein bands were detected by anti-myc immunoblot (10% SDS-PAGE). The asterisk marker indicated the E2-dependent ubiquitination bands.

(B) Auto-ubiquitination of DRIP2-MBP was detected at the presence of UBCH5c. MBP antibody was used to detect DRIP2-MBP fusion protein, and the shifted band in the last line indicated ubiquitin molecules attached to DRIP2-MBP protein (6% SDS-PAGE).

(C) The wildtype and RING domain deleted DRIP2-GST fusion protein (DRIP2 del1-60-MBP) E3 ubiquitin ligase activity was tested at the presence of UBCH5c (E2), E1 and ubiquitin. MBP antibody was used to detect DRIP2-MBP fusion protein (6% SDS-PAGE).

(D) DRIP2 mediates ubiquitination of DREB2A protein. The full-length DREB2A protein was fused with a His and Trx tag (DREB2A-His-Trx) and was used as the substrate for the in vitro assay. Anti-Trx was used in the immunoblot for the detection of Trx-tagged substrate protein (6% SDS-PAGE).

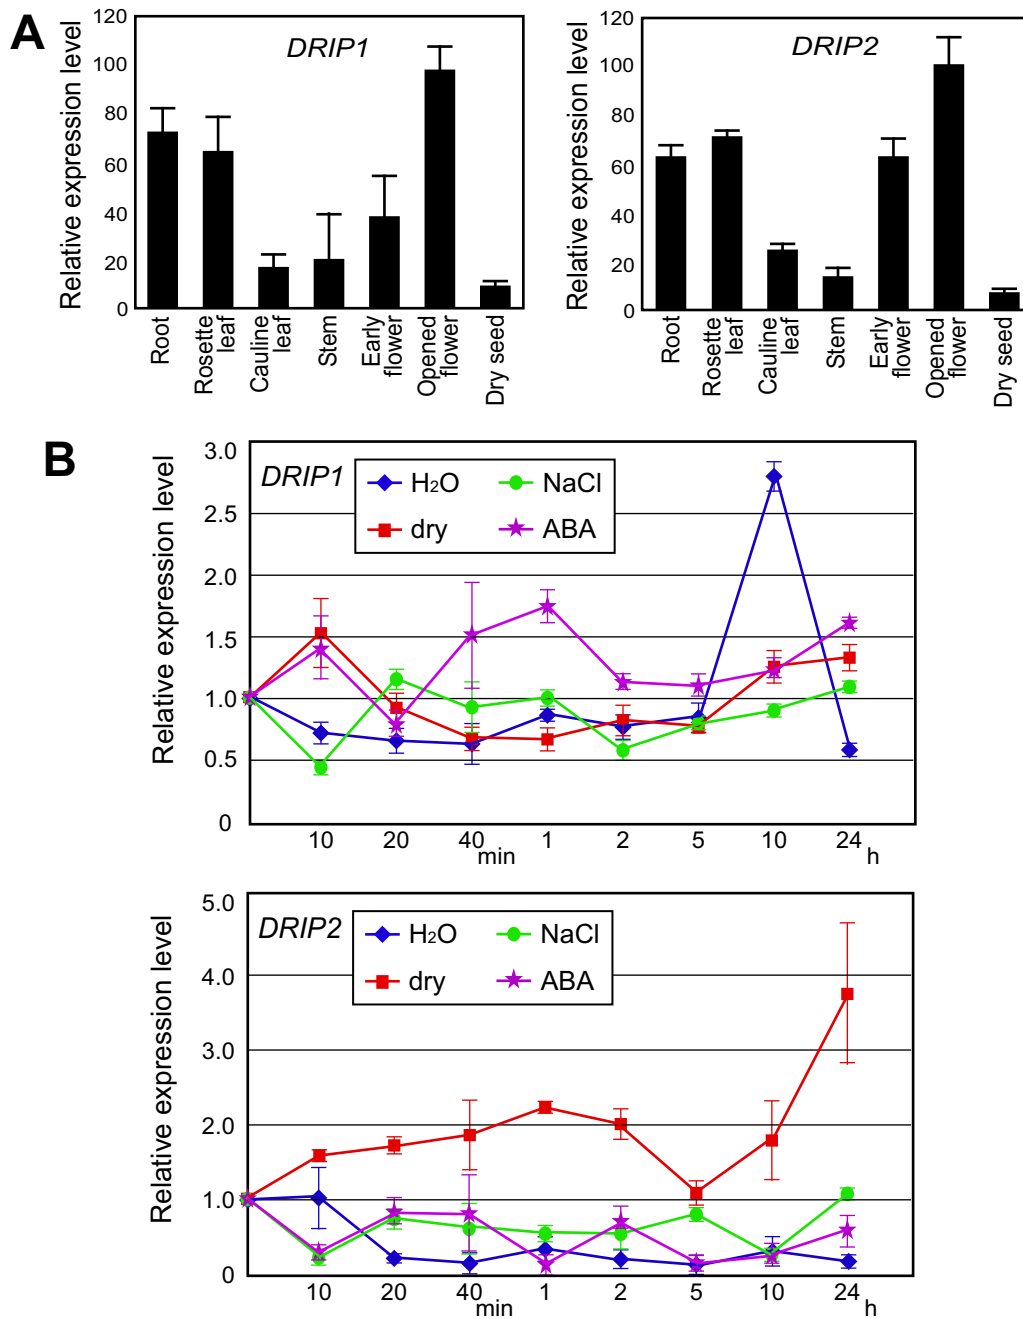

### Supplemental Figure 3. *DRIP1* and *DRIP2* Gene Expression Profiling under Various Stresses in Different Tissues.

(A) qRT-PCR analysis of *DRIP1* and *DRIP2* gene expressions under normal conditions in various tissues. Roots and rosette leaves were obtained from 3-week-old plants; cauline leaves and stems were harvested from inflorescences of 9-week-old plants; early flowers were in flowering stages 7-10; opened flowers in flowering stages 11-13. Dry seeds were collected from a well-matured seed stock which exhibited a good germination rate. All materials were obtained from the Columbia wild type background.

(B) qRT-PCR analyses of *DRIP1* and *DRIP2* gene expressions under various stress conditions. 3-week-old Columbia plants growing on agar plates were subjected to stress treatments (250 mM NaCl; dehydration; 100  $\mu$ M ABA) and a H<sub>2</sub>O treatment was used as a control. Gene expression under 0 h was designated as 1.0, respectively.

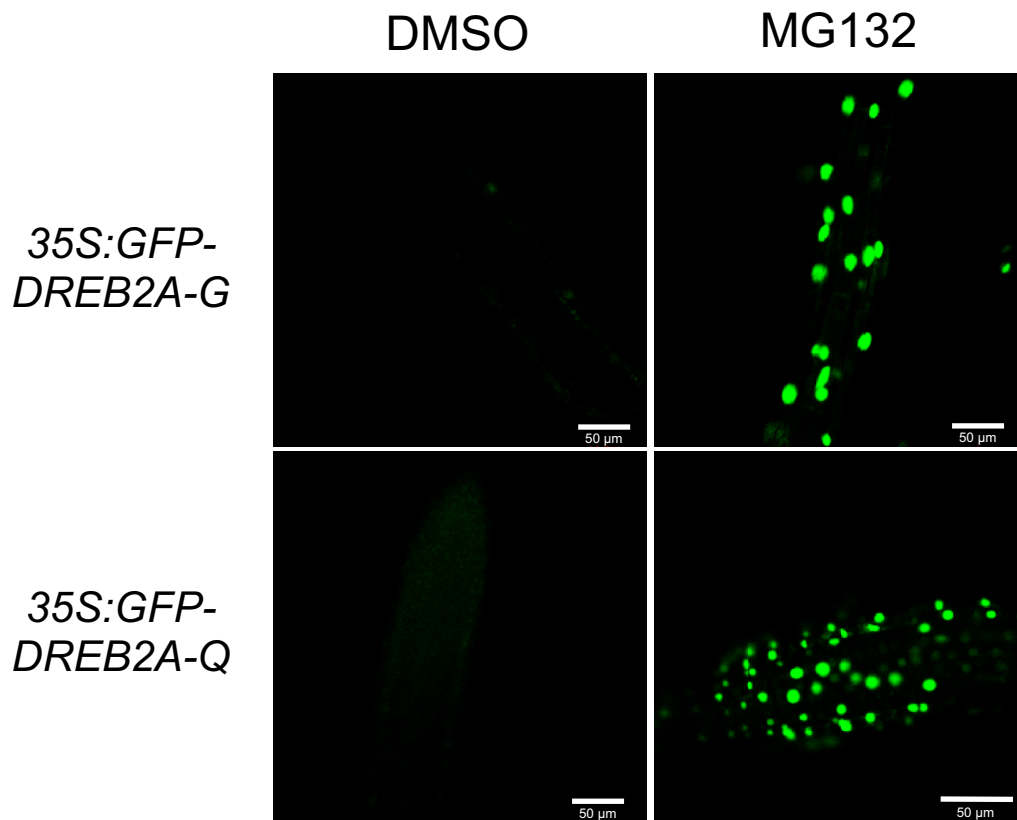

**Supplemental Figure 4. Proteasome inhibitor MG132 inhibits GFP-DREB2A fusion protein degradation when it is overexpressed by 35S promoter in *Arabidopsis*.**

Two independent transgenic lines, *35S:GFP-DREB2A-G* and *Q*, were treated by DMSO (mock treated) or proteasome inhibitor MG132 for 15 hrs and observed under confocal microscope. Bars indicate 50 μm.

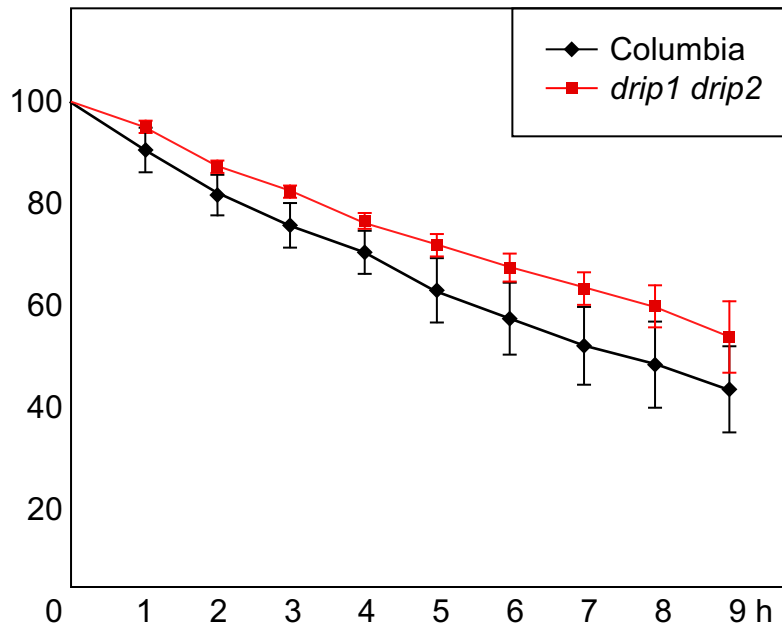

**Supplemental Figure 5. Relative Water Content of Wild-type Columbia and *drip1 drip2* Double Mutant under Dehydration Conditions.**

The aerial parts of 4-week-old soil-grown plants were detached and dehydrated on empty dishes in 65%±5% relative humidity. The standardized water content was calculated as described in Fujita et al. (2005). Each data point represents the mean of duplicate measurements (n=8). Error bars represent standard deviation.

Qin et al. Supplemental Table 1. The Primer List Used in qRT-PCR

| no. | primer                       | 5' - 3'                                                         | Note                               |
|-----|------------------------------|-----------------------------------------------------------------|------------------------------------|
| 1   | DREB2A RealT F               | GACCTAAATGGCGACGATGT                                            |                                    |
| 2   | DREB2A RealT R               | TCGAGCTGAAACCGGAGGTAT                                           |                                    |
| 3   | 18S rRNA-F                   | AAACGGCTACCACATCCAAG                                            |                                    |
| 4   | 18S rRNA-R                   | CCTCCAATGGATCCTCGTTA                                            |                                    |
| 5   | DRIP1-RealT F1               | GAATTTGCCACAACCAAGATGAG                                         | for realtime PCR in Columbia       |
| 6   | DRIP1-RealT R1               | GCCACAAGTGAGAAACCAACCG                                          | for realtime PCR in Columbia       |
| 7   | DRIP1-RealT F2               | CCGTGACGCCACCACATATC                                            | for realtime PCR in <i>drip1-1</i> |
| 8   | DRIP1-RealT R2               | CATCCTCCGTGATCTTCTCATAGA                                        | for realtime PCR in <i>drip1-1</i> |
| 9   | DRIP2-RealT F                | TTTTTCTTGTGGATGTGGCAAAAC                                        |                                    |
| 10  | DRIP2-RealT R                | TTTACTCCCCTGAACATCATTTGTGG                                      |                                    |
| 11  | Promoter-DRIP1-F             | GGGGATCCAGGAGATGACCTAGAGGAACC                                   |                                    |
| 12  | Promoter-DRIP1-R             | GGGGATCCCCTTCTCTTTATCTGTGGGG                                    |                                    |
| 13  | DREB2A 165aa-MYC-STOP-NOTI-R | TTTGGGGCCGCTCACAGATCTTCTTCAGAAATAAGTTTTTGTTCCTCTGTTTTACATGAACAC |                                    |
| 14  | SALK_145041-LP               | TTGTGGTGGCGAACTTATTC                                            |                                    |
| 15  | SALK_145041-RP               | TGAAACCAGTAAAGCCGTGTC                                           |                                    |
| 16  | WiscDsLox437G06-LP           | TCTCTCCTTCCCTTTCCTGG                                            |                                    |
| 17  | WiscDsLox437G06-RP           | GCTTAAAGCTGCTCTATCTGCG                                          |                                    |
| 18  | T-DAN left border            | GCGTGGACCCGCTTGCTGCAACT                                         |                                    |
| 19  | At rd29A-F                   | TGGACACGAAATCTCCAATCA                                           |                                    |
| 20  | At rd29A-R                   | TTCCAGCTCAGCTCCTTGATT                                           |                                    |
| 21  | At rd29B-F                   | GGAGAGAGCAGAGAGGGCTCA                                           |                                    |
| 22  | At rd29B-R                   | CCGTTGACCACCCGAGATAGT                                           |                                    |
| 23  | rd17-F                       | ACGTCCACGCCGTTGGT                                               |                                    |
| 24  | rd17-R                       | CTCCGGATGTTCCACTGGAA                                            |                                    |
| 25  | At1g52690-F                  | GCAATCAAGAACAAGGCACA                                            |                                    |
| 26  | At1g52690-R                  | TCAGTGGAAAGCCCTAAAAGT                                           |                                    |
| 27  | LEA14-F                      | GATTTCTTCTGATCGACAAAACCTA                                       |                                    |
| 28  | LEA14-R                      | AGCAAAACCAACTTATTACATTACG                                       |                                    |

|    |                     |                               |
|----|---------------------|-------------------------------|
| 29 | AT3g17520-F         | GGTTTGGTTATGGTATCTTTGGTACTTA  |
| 30 | AT3g17520-R         | CTTTGCCCAAATCAGTCCATGAT       |
| 31 | AtGolS1 At2g47180-F | CTTGGAAAAGTCAAGGTGGTTCA       |
| 32 | AtGolS1 At2g47180-R | TCGCTTCTTTCCCTGTGTATCTC       |
| 33 | AtGolS2 At1g56600-F | GACGAGTCTCTTGAATTACAAAGAATGTT |
| 34 | AtGolS2 At1g56600-R | AAACTGCTGAAGTCTCTGTTGC        |
| 35 | At2g21490-F         | GGCAAAACAAGGACGAAACA          |
| 36 | At2g21490-R         | TCGTGAGGTTGGTCGGTAGTG         |

**Supplemental Table 2. Positive Clones from Library Screening**

| Clone NO. | -His-Ade | $\beta$ -gal | 20 mM 3-AT | AGI code  | MIPS annotation                                           | Function of its homolog in other organism                              |
|-----------|----------|--------------|------------|-----------|-----------------------------------------------------------|------------------------------------------------------------------------|
| 17        | +        | +++          | +++        | A1g06770  | C3HC4 Ring domain/zinc finger like protein                | E3 ubiquitin ligase activity                                           |
| 36        | +        | +            | +/-        | A13g51260 | multicatalytic endopeptidase complex alpha chain          |                                                                        |
| 77        | +        | +            | +          | A1g53280  | cytoplasmic and nuclear protein degradation               |                                                                        |
| 23        | +        | +            | +/-        | A1g170300 | high affinity potassium transporter AHAK6                 |                                                                        |
| 6         | +        | +            | -          | A12g35500 | unknown protein, predicted to be targeted to chloroplasts | shikimate kinase precursor, tomato                                     |
| 21        | +        | +            | -          | A12g35500 | unknown protein, predicted to be targeted to chloroplasts | shikimate kinase precursor, tomato                                     |
| 2         | +        | +            | +          | A14g27750 | unknown protein                                           | impaired sucrose induction 1-like protein [Solanum tuberosum].         |
| 14        | +        | +            | +          | A14g27750 | unknown protein                                           | impaired sucrose induction 1-like protein [Solanum tuberosum].         |
| 3         | +        | +/-          | ++         | A13g46780 | unknown protein, predicted to be targeted to chloroplasts | NADH2 dehydrogenase (ubiquinone)   chain nueM Aquifex aeolicus         |
| 4         | +        | +            | +          | A13g46780 | unknown protein, predicted to be targeted to chloroplasts | NADH2 dehydrogenase (ubiquinone)   chain nueM Aquifex aeolicus         |
| 5         | +        | +            | +          | A13g46780 | unknown protein, predicted to be targeted to chloroplasts | NADH2 dehydrogenase (ubiquinone)   chain nueM Aquifex aeolicus         |
| 9         | +        | +            | -          | A13g46780 | unknown protein, predicted to be targeted to chloroplasts | NADH2 dehydrogenase (ubiquinone)   chain nueM Aquifex aeolicus         |
| 7         | +        | +            | +          | A14g36980 | unknown protein, predicted to be targeted to mitochondria | likely to be a transmembrane protein                                   |
| 10        | +        | +            | +          | A14g36980 | unknown protein, predicted to be targeted to mitochondria | likely to be a transmembrane protein                                   |
| 26        | +        | +            | +          | A14g36980 | unknown protein, predicted to be targeted to mitochondria | likely to be a transmembrane protein                                   |
| 48        | +        | +            | +          | A14g36980 | unknown protein, predicted to be targeted to mitochondria | likely to be a transmembrane protein                                   |
| 12        | +        | +            | ++         | A14g28910 | unknown protein                                           | putative RNA-binding protein                                           |
| 22        | +        | +            | +          | A1g21560  | hypothetical protein                                      | putative RNA helicase                                                  |
| 24        | +        | ++           | +          | A13g04480 | unknown protein                                           | endoribonuclease L-FSP family protein-like, rice                       |
| 25        | +        | -            | -          | A1g20960  | putative ATP-dependent RNA helicase                       |                                                                        |
| 49        | +        | -            | -          | A1g20960  | putative ATP-dependent RNA helicase                       |                                                                        |
| 19        | +        | +            | -          | A13g25920 | 50S ribosomal protein L15, chloroplast precursor          |                                                                        |
| 13        | +        | +            | -          | A13g25920 | 50S ribosomal protein L15, chloroplast precursor          |                                                                        |
| 30        | +        | +/-          | -          | A13g25920 | 50S ribosomal protein L15, chloroplast precursor          |                                                                        |
| 27        | +        | +/-          | -          | A1g31817  | 30S ribosomal like protein S11                            |                                                                        |
| 33        | +        | +/-          | -          | A13g49080 | 30S ribosomal protein S9 -like                            |                                                                        |
| 68        | +        | -            | -          | A13g49080 | 30S ribosomal protein S9 -like                            |                                                                        |
| 37        | +        | +/-          | -          | A1g20100  | unknown protein                                           | putative RNA-binding protein                                           |
| 41        | +        | +            | -          | A13g04260 | hypothetical protein                                      | putative DNA binding domain containing protein, rice                   |
| 1         | +        | ++           | ++         | A1g54440  | hypothetical protein, Targeted to secretory pathway       | ribonuclease III [Brucella melitensis (strain 16M)]                    |
| 16        | +        | +            | -          | A1g54440  | hypothetical protein, Targeted to secretory pathway       | ribonuclease III [imported] Brucella melitensis (strain 16M)           |
| 35        | +        | -            | -          | A15g13430 | ubiquinol--cytochrome-c reductase - like protein          |                                                                        |
| 74        | +        | -            | -          | A15g13430 | ubiquinol--cytochrome-c reductase - like protein          |                                                                        |
| 52        | +        | -            | -          | A15g13430 | ubiquinol--cytochrome-c reductase - like protein          |                                                                        |
| 40        | +        | +            | -          | A1g21130  | O-methyltransferase like protein                          |                                                                        |
| 38        | +        | +/-          | -          | A1g31180  | 3-isopropylmalate dehydrogenase like protein              |                                                                        |
| 75        | +        | -            | *          | A1g68560  | alpha-xylosidase precursor                                |                                                                        |
| 28        | +        | ++           | ++         | A13g15580 | unknown protein                                           | putative microtubule-associated protein                                |
| 76        | +        | -            | *          | A14g15880 | unknown protein                                           | putative microtubule-associated protein                                |
| 66        | +        | -            | *          | A15g18440 | unknown protein                                           | nuclear FMRP interacting protein 1 NUFIP1, Homo sapiens, EMBL:AF159548 |
| 15        | +        | +            | *          | A12g30350 | unknown protein                                           |                                                                        |
| 32        | +        | +            | *          | A14g26630 | unknown protein                                           |                                                                        |

\* indicates cell growth or positive signals; \*\* indicates no cell growth or negative signals; \*\*\* indicates no data.



## Description of pGreen Vectors

### pGKX:

To remove EcoRV site between the EI2 and the CaMV 35S promoter sequences in pBE2113 (Mitsuhara et al., 1996), two DNA fragments containing a portion of EI2-35S $\Omega$  cDNA were generated by PCR with the following two pairs of primers: forward primer A, 5'-GACCATGATTACGCCAAGCTTGAAC-3'; reverse primer A, 5'-GTGGAGACAGCACATCAATCCAC-3'; forward primer B, 5'-GATGTGCTGTCTCCACTGACGTAAG-3'; reverse primer B, 5'-GATATCTCGAGCTCGCGGCCGCCCCGGGGAT-3'. The resulting purified fragments A and B were mixed in a tube for PCR, denatured at 94 °C for 10 min, annealed, and polymerized at 72 °C for 3 min. Then, a DNA fragment amplified in the tube with forward primer A and reverse primer B was directly inserted into pGreen-NOS cassette (Hellens et al., 2000) at XbaI site, in which XbaI cleavage was blunted with T4 DNA polymerase. The resultant plasmid, pGreen-NOS-EI2-35S, was digested with HindIII and SphI to give a 1128-bp fragment. The HindIII-SphI cleavage site was blunted with T4 DNA polymerase. The 1128-bp fragment was then inserted into pGreen II 0029 at a ApaI-SacI site, in which ApaI-SacI cleavage was also blunted with T4 DNA polymerase, producing pGreen II 0029-EI2-35S $\Omega$  (named pGKX).

### pGKX-NsGFP:

To gain the sGFP cDNA (Chiu et al., 1996), PCR was performed on pGFP3BX (Fujita et al., 2004) using the primer pair 5'-GGGACTAGTATGGTGAGCAAGGGCGAG-3' and 5'-GGGTCTAGATGCTTGTACAGCTCGTCCAT-3'. The sGFP cDNA fragment was inserted into pGKX at XbaI site to generate pGK-EI2-35S $\Omega$ -NsGFP (named pGKX-NsGFP).

### pGKX-CsGFP:

pGFP3BX (Fujita et al., 2004) was digested with BamHI and PstI to give a 743-bp fragment. The BamHI-PstI cleavage site was blunted with T4 DNA polymerase. The 743-bp fragment was cloned into pGK-EI2-35S $\Omega$  at a XhoI site, in which XhoI cleavage was also blunted with T4 DNA polymerase, to generate pGK-EI2-35S $\Omega$ -CsGFP (named pGKX-CsGFP).

pGK-GUS:

To gain the GUS-CaMV terminator fragment, PCR was performed on pGreen-35S-GUS cassette (Hellens et al., 2000) using the primer pair 5'-TATGTTACGTCCTGTAGAAACC-3' and 5'-GATCTGGATTTTAGTACTGG-3', producing a 2120-bp fragment. The 2120-bp fragment was directly inserted into pGreenII 0029 (Hellens et al., 2000) at an ApaI site, in which ApaI cleavage was blunted with T4 DNA polymerase, producing pGreen II 0029-GUS (named pGK-GUS).

**Supplemental References**

Chiu, W., Niwa, Y., Zeng, W., Hirano, T., Kobayashi, H., and Sheen, J. (1996). Engineered GFP as a vital reporter in plants. *Curr. Biol.* **6**: 325-330.

Fujita, M., Fujita, Y., Maruyama, K., Seki, M., Hiratsu, K., Ohme-Takagi, M., Tran, L.-S. P., Yamaguchi-Shinozaki, K., and Shinozaki, K. (2004). A dehydration-induced NAC protein, RD26, is involved in a novel ABA-dependent stress-signaling pathway. *Plant J.* **39**: 863-876.

Hellens, R.P., Edwards, E.A., Leyland, N.R., Bean, S., and Mullineaux, P.M. (2000). pGreen: a versatile and flexible binary Ti vector for *Agrobacterium*-mediated plant transformation. *Plant Mol Biol.* **42**: 819-832.

Mitsuhara, I., Ugaki, M., Hirochika, H., Ohshima, M., Murakami, T., Gotoh, Y., Katayose, Y., Nakamura, S., Honkura, R., Nishimiya, S., Ueno, K., Mochizuki, A., Tanimoto, H., Tsugawa, H., Otsuki, Y., and Ohashi, Y. (1996). Efficient promoter cassettes for enhanced expression of foreign genes in dicotyledonous and monocotyledonous plants. *Plant Cell Physiol.* **37**: 49-59.
